# Supplementary material for: Administration of probiotic lactic acid bacteria to modulate fecal microbiome in feedlot cattle
Source: PubMed Central journal article supplement (PMC9334624; doi:10.1038/s41598-022-16786-z), 2022-07-28
Supplement: 41598_2022_16786_MOESM1_ESM.pdf [file 41598_2022_16786_MOESM1_ESM.pdf]

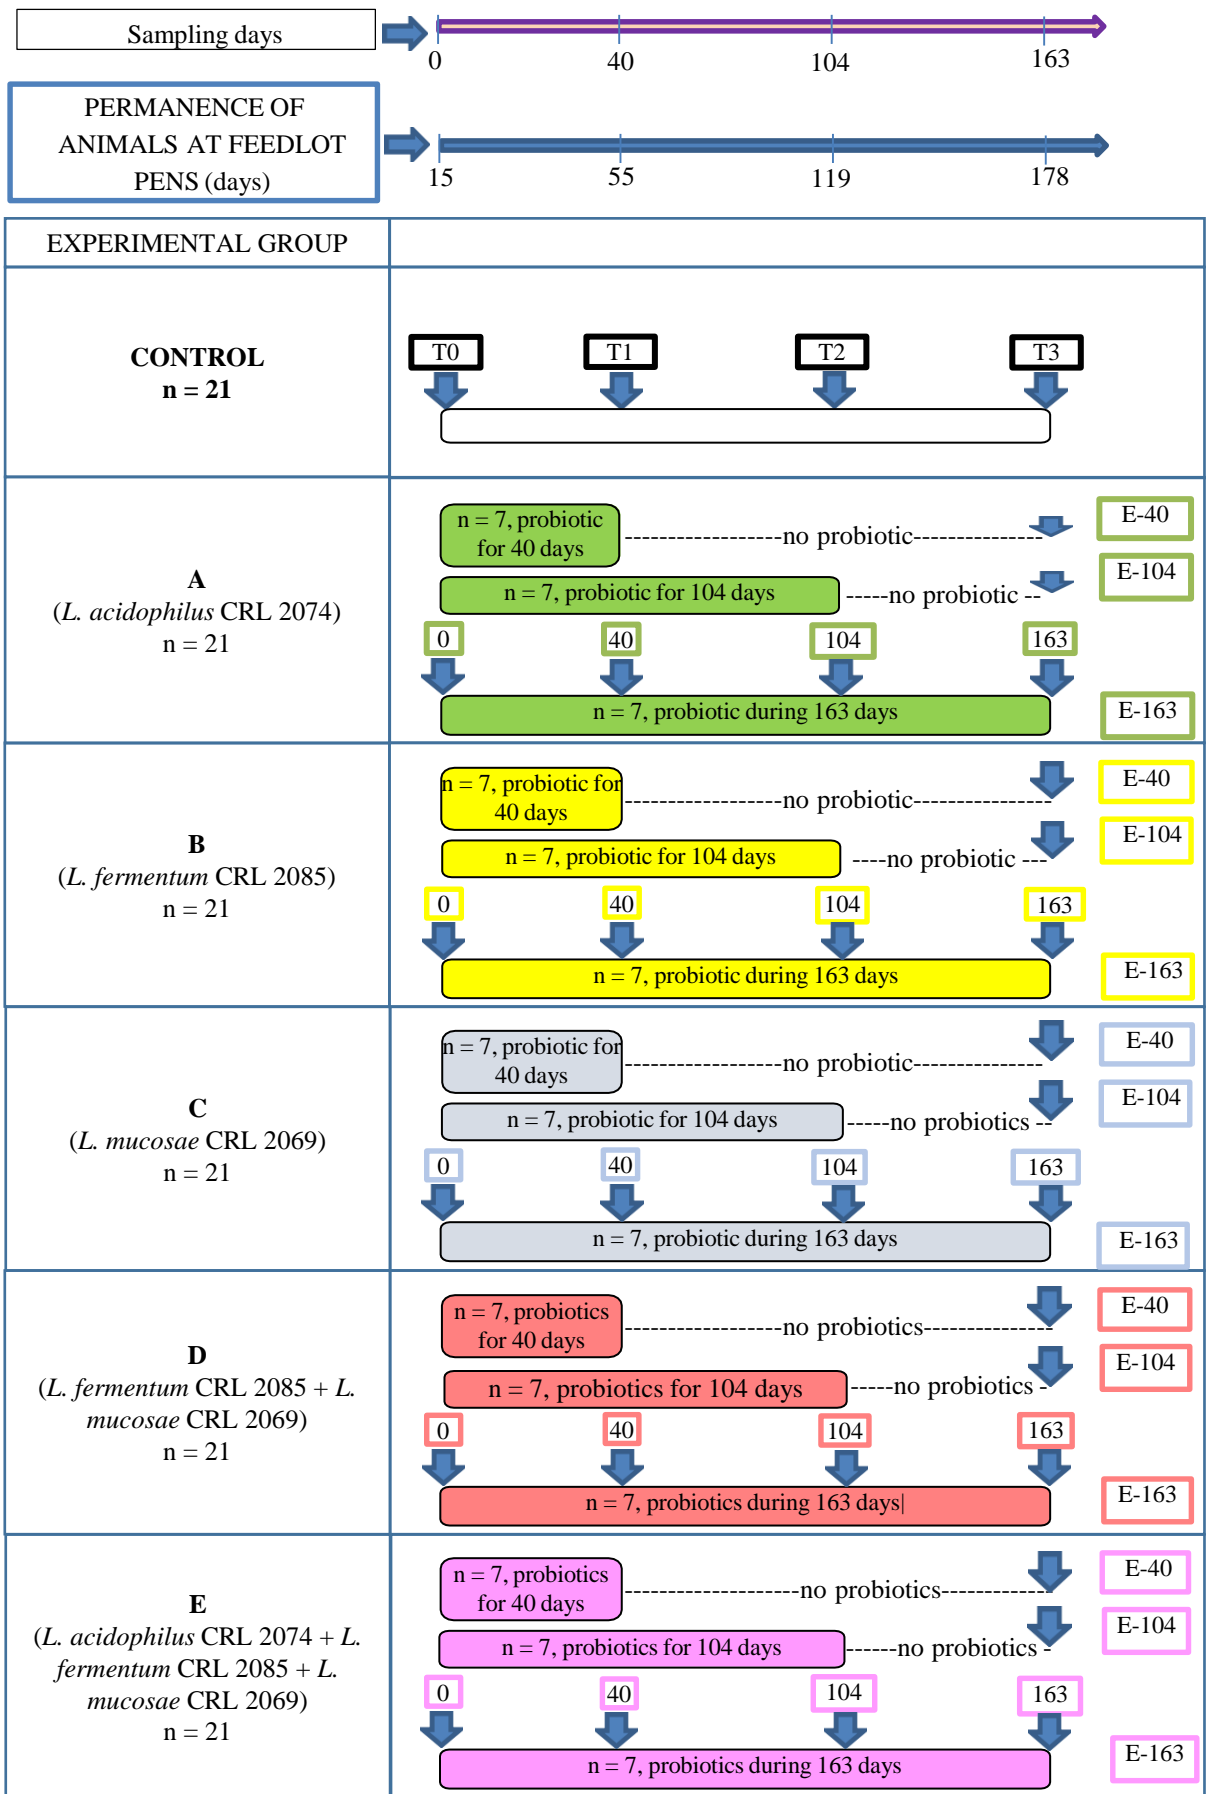

Fig. S1

**Fig. S1** Detailed experimental protocol and sampling scheme: animals (n = 7) received probiotics up to 40 days and then removed (to separate pen) experimental period E-40; animals (n = 7) received probiotics up to 104 days and then removed, E-104 and, animals (n = 7) administered probiotics for 163 days E-163. This scheme was replicated for the following probiotic groups: A: *Lactobacillus (L.) acidophilus* CRL 2074; B: *Limosilactobacillus (L.) fermentum* CRL 2085; C: *Limosilactobacillus (L.) mucosae* CRL 2069; D: CRL 2085 + CRL 2069; E: CRL 2074 + CRL 2085 + CRL 2069; Control group (n = 21) included in a separate pen and analyzed from T0 to T3.
