# Supplementary material for: Administration of probiotic lactic acid bacteria to modulate fecal microbiome in feedlot cattle
Source: PubMed Central journal article supplement (PMC9334624; doi:10.1038/s41598-022-16786-z), 2022-07-28
Supplement: 41598_2022_16786_MOESM2_ESM.pdf [file 41598_2022_16786_MOESM2_ESM.pdf]

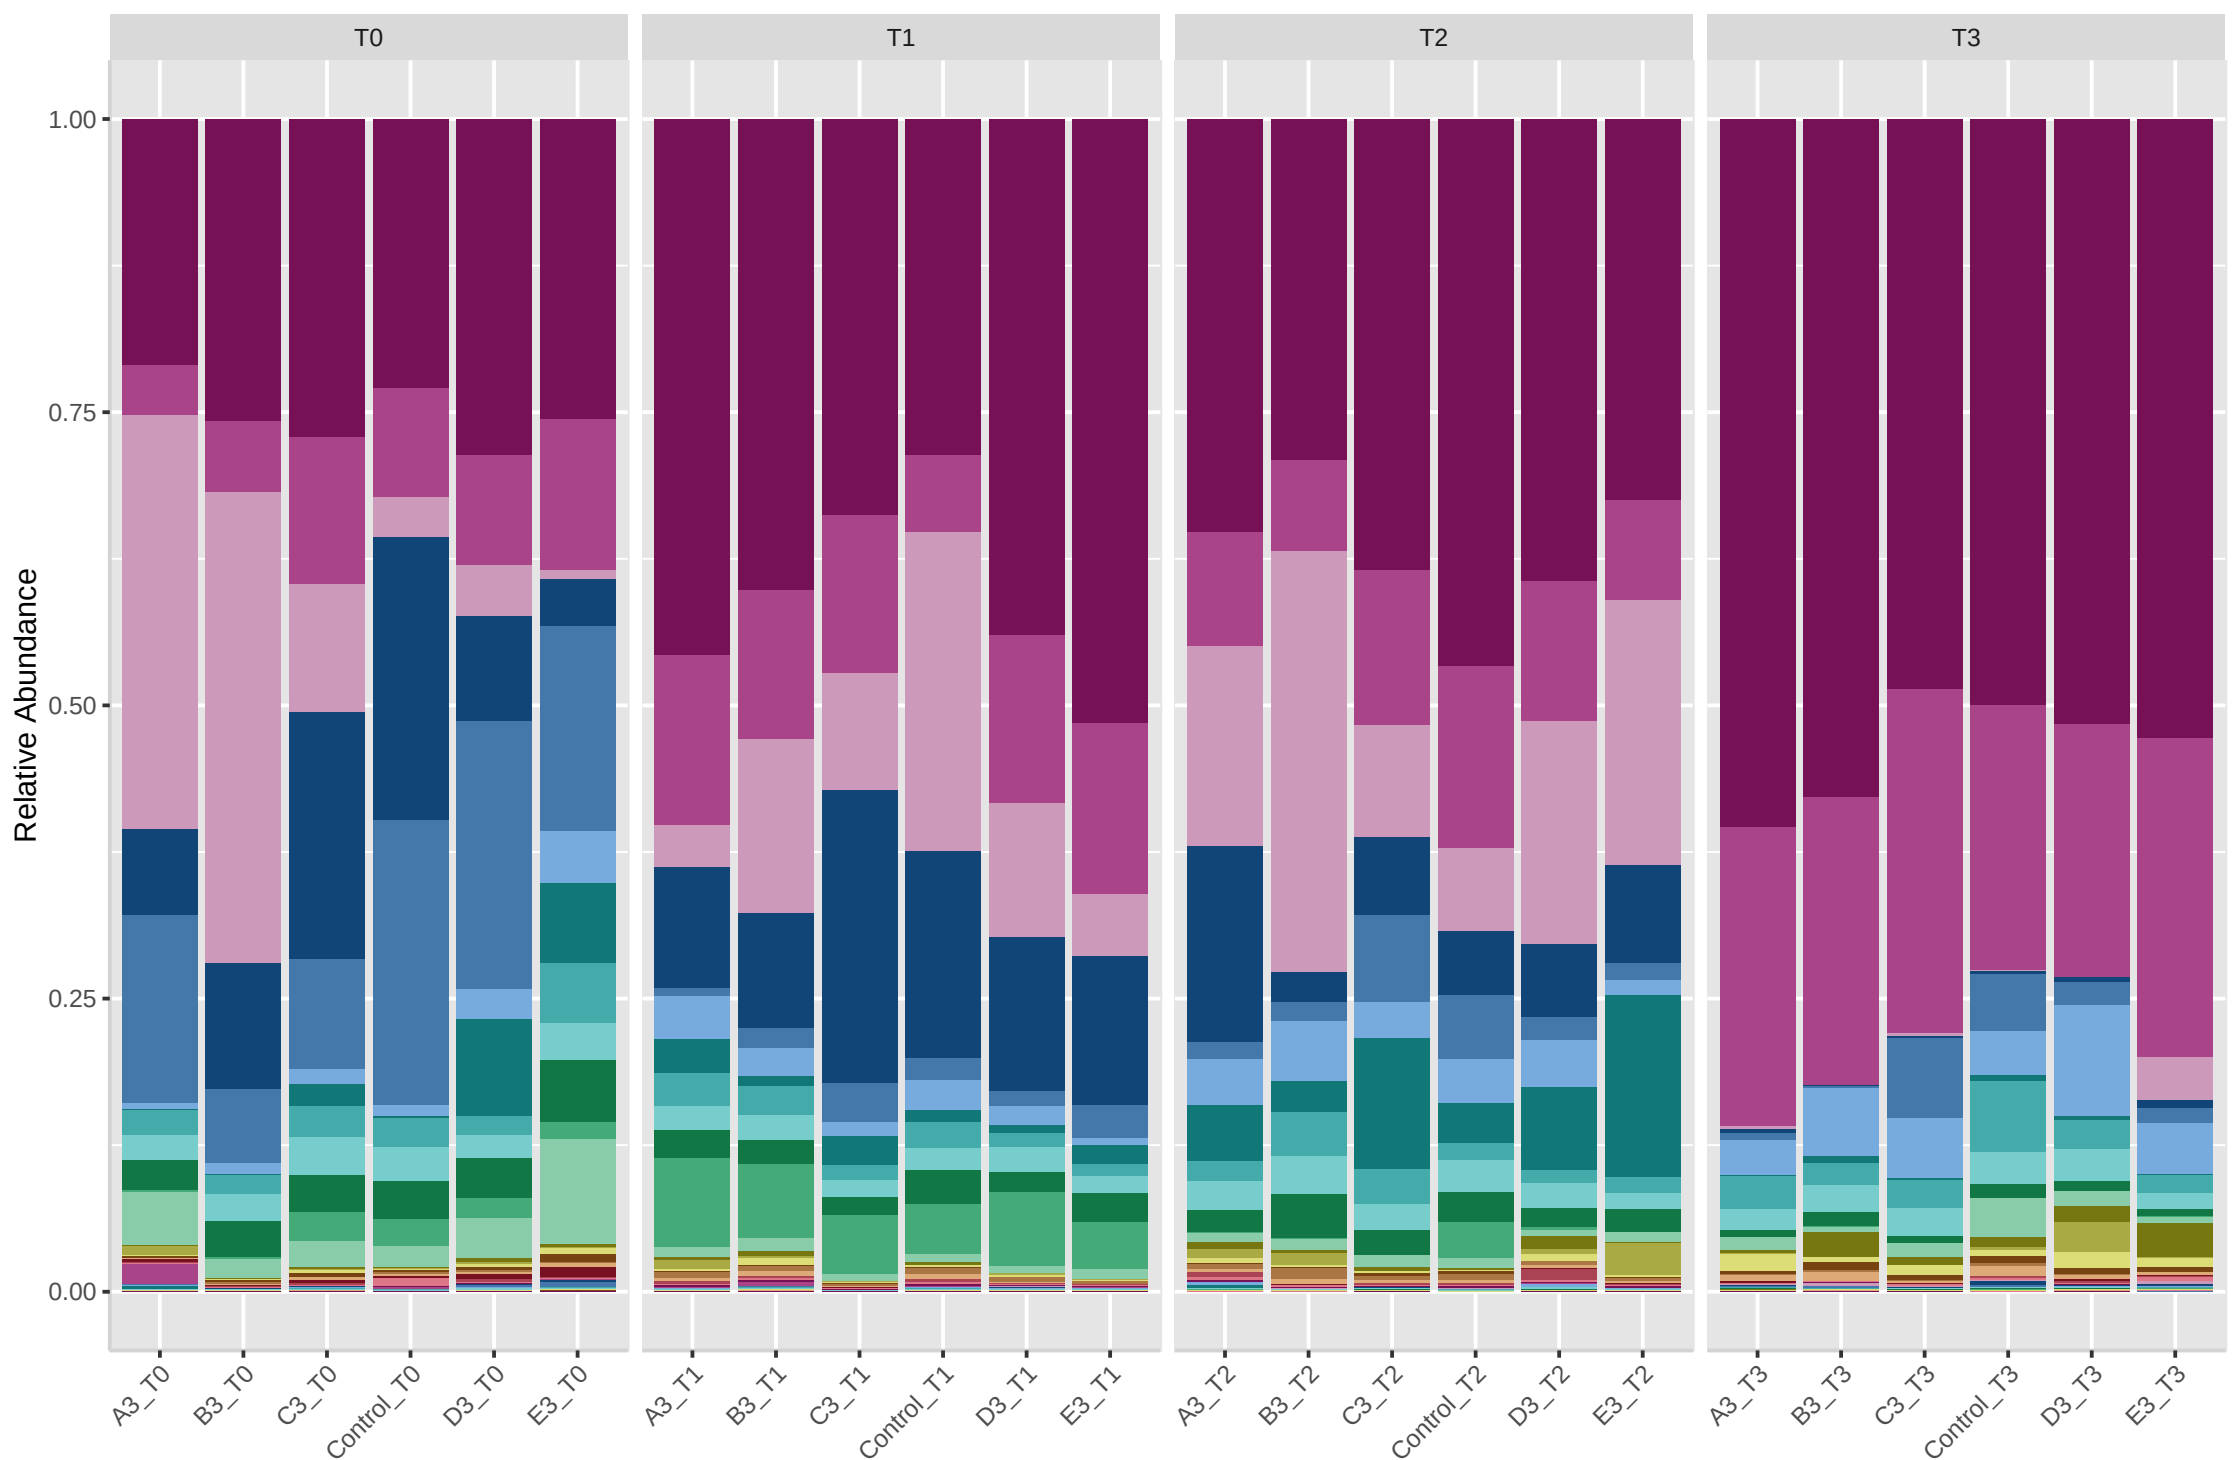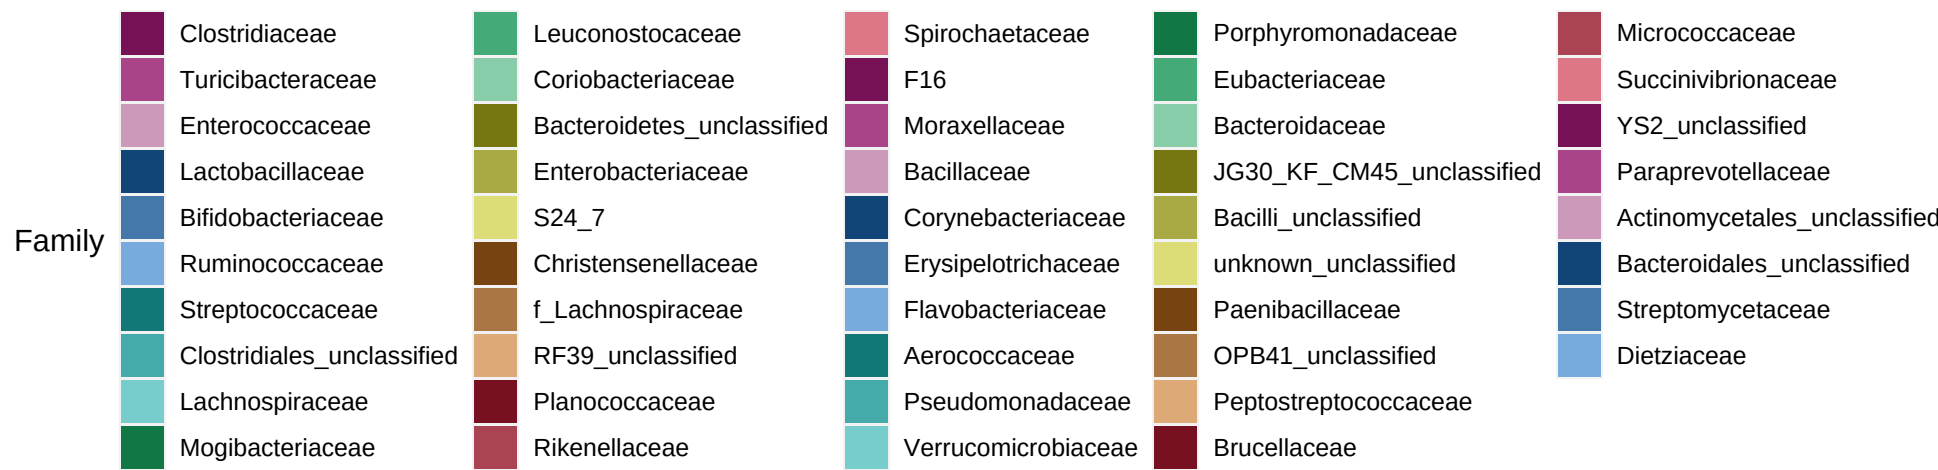

Fig. S2

**Fig. S2** Relative abundance data at the family level in probiotics (A: *Lactobacillus acidophilus* CRL 2074; B: *Limosilactobacillus fermentum* CRL 2085; C: *Limosilactobacillus mucosae* CRL 2069; D: CRL 2085 + CRL 2069; E: CRL 2074 + CRL 2085 + CRL 2069)-treated and untreated (control) fecal samples of feedlot cattle at different experimental periods (T0: 0 day; T1: 40 days; T2: 104 days; T3: 163 days). Each color represents a family.
